# Supplementary material
Source: publisher figshare collection journal article supplement (https://tandf.figshare.com/ndownloader/files/37568798)
Supplement: Supplementary file 1 [file 37568798]

## Sheet: DE_blue-turquoise_gene_KEGG
Supplementary Table 9 KEGG analysis of the overlapping genes
ID	Description	GeneRatio	BgRatio	pvalue	p.adjust	qvalue	geneID	Count
bta01200	Carbon metabolism	20/260	112/9010	4.69996e-11	1.33009e-08	1.04389e-08	514066/281181/281206/539188/282446/613610/538173/445425/282873/531682/280910/509566/506459/540303/281235/338471/515067/512571/281543/513483	20
bta00010	Glycolysis / Gluconeogenesis	14/260	64/9010	2.58202e-09	3.65355e-07	2.8674e-07	514066/281181/281275/282855/613610/282873/534402/509566/506459/540303/515067/512571/281543/513483	14
bta01230	Biosynthesis of amino acids	12/260	73/9010	9.93919e-07	7.6816e-05	6.02871e-05	281181/281206/539188/282446/445425/509566/540303/281235/338471/515067/512571/281543	12
bta04510	Focal adhesion	20/260	201/9010	1.29011e-06	7.6816e-05	6.02871e-05	524770/282191/515011/281875/533729/525931/107131237/286799/280979/338037/615414/100298939/526379/518180/531505/505519/533378/514106/281530/541281	20
bta04922	Glucagon signaling pathway	14/260	103/9010	1.35717e-06	7.6816e-05	6.02871e-05	514066/281275/282855/613610/511783/338446/282323/511961/530719/509459/515067/100336808/512571/513483	14
bta04932	Non-alcoholic fatty liver disease	17/260	164/9010	4.7348e-06	0.000223325	0.000175271	444878/280795/281251/538598/327673/338084/338065/287327/338079/287027/287014/511961/282393/286885/282865/407234/338086	17
bta04714	Thermogenesis	20/260	240/9010	1.91952e-05	0.000776035	0.000609051	444878/286879/327673/338084/338065/287327/338079/287027/287014/520598/508493/338446/282323/511961/282393/286885/280979/100298939/338086/509459	20
bta04921	Oxytocin signaling pathway	15/260	153/9010	3.36782e-05	0.00119137	0.000935013	280795/281790/107131237/282323/511961/280979/338037/281341/100298939/526379/282608/530719/515421/533378/282023	15
bta04910	Insulin signaling pathway	14/260	138/9010	4.21917e-05	0.00132669	0.00104122	514066/538598/286879/282855/511783/338446/539466/282323/511961/100298939/518180/100336808/784877/513483	14
bta04371	Apelin signaling pathway	14/260	141/9010	5.35792e-05	0.00138019	0.00108321	407125/281790/286879/540803/520598/338446/282323/511961/281375/338037/100298939/526379/505519/533378	14
bta04810	Regulation of actin cytoskeleton	18/260	217/9010	5.36471e-05	0.00138019	0.00108321	524770/515011/281875/540803/317655/533729/525931/107131237/280979/338037/100298939/526379/518180/531505/505519/533378/514106/539034	18
bta04260	Cardiac muscle contraction	11/260	93/9010	7.01714e-05	0.00165487	0.00129879	444878/100296004/282393/286885/533219/282608/528555/338086/505519/281544/518117	11
bta00030	Pentose phosphate pathway	6/260	28/9010	0.000120294	0.00243167	0.00190843	514066/445425/534402/280910/509566/513483	6
bta00650	Butanoate metabolism	6/260	28/9010	0.000120294	0.00243167	0.00190843	280969/534090/514230/282576/100298888/535508	6
bta05415	Diabetic cardiomyopathy	17/260	215/9010	0.000155871	0.00294076	0.00230798	444878/281181/538598/327673/338084/338065/287327/338079/287027/287014/613610/282393/286885/530719/338086/509459/518117	17
bta05208	Chemical carcinogenesis - reactive oxygen species	18/260	240/9010	0.000194859	0.00344656	0.00270494	444878/535293/280795/493719/507346/327673/338084/338065/287327/338079/287027/287014/282393/286885/511716/531682/100298939/338086	18
bta00620	Pyruvate metabolism	7/260	44/9010	0.000236115	0.00372684	0.00292491	281275/282855/613610/282873/506459/338471/512571	7
bta04923	Regulation of lipolysis in adipocytes	8/260	58/9010	0.000237043	0.00372684	0.00292491	281759/281790/538598/286879/520598/508493/282323/282023	8
bta05410	Hypertrophic cardiomyopathy	10/260	92/9010	0.000302633	0.00450764	0.0035377	515011/281875/100296004/511961/280979/533219/282608/505519/281544/518117	10
bta00051	Fructose and mannose metabolism	6/260	34/9010	0.000371388	0.00525514	0.00412436	514066/513586/534928/509566/281543/513483	6
bta05030	Cocaine addiction	7/260	48/9010	0.000411211	0.00554156	0.00434915	280762/540819/281790/281293/338445/282323/282459	7
bta05414	Dilated cardiomyopathy	10/260	99/9010	0.000547999	0.00704926	0.00553243	515011/281875/100296004/282323/280979/533219/282608/505519/281544/518117	10
bta04611	Platelet activation	11/260	121/9010	0.000721714	0.00888022	0.00696942	282226/281790/515011/281963/282323/280979/338037/507309/526379/531505/533378	11
bta05031	Amphetamine addiction	8/260	69/9010	0.000786887	0.0092787	0.00728215	280762/280795/540819/281293/338445/282323/282459/530719	8
bta04152	AMPK signaling pathway	11/260	123/9010	0.000828108	0.00933993	0.0073302	514066/538598/286879/282855/534928/338446/511961/282865/407234/509459/513483	11
bta00190	Oxidative phosphorylation	12/260	143/9010	0.000858085	0.00933993	0.0073302	444878/327673/338084/338065/287327/338079/287027/287014/282393/286885/282657/338086	12
bta05010	Alzheimer disease	23/260	402/9010	0.00131641	0.0134014	0.0105178	444878/281094/523325/347700/281181/281251/538598/533894/327673/338084/338065/287327/338079/287027/287014/521004/282393/286885/100298939/789600/338086/518117/282023	23
bta05012	Parkinson disease	18/260	282/9010	0.00132594	0.0134014	0.0105178	444878/281790/281293/338445/327673/338084/338065/287327/338079/287027/287014/282323/521004/282393/286885/530719/338086/539175	18
bta04971	Gastric acid secretion	8/260	76/9010	0.00149215	0.0145613	0.0114281	281790/282323/280979/338037/526379/530719/533378/521257	8
bta00020	Citrate cycle (TCA cycle)	5/260	31/9010	0.00176858	0.0161454	0.0126713	282446/282855/613610/281235/338471	5
bta00640	Propanoate metabolism	5/260	31/9010	0.00176858	0.0161454	0.0126713	280969/280759/281275/282873/506459	5
bta01210	2-Oxocarboxylic acid metabolism	4/260	19/9010	0.00186511	0.0164946	0.0129453	281206/539188/282446/281235	4
bta04270	Vascular smooth muscle contraction	11/260	140/9010	0.00237018	0.0203261	0.0159524	317655/107131237/282323/281595/338037/281341/407176/526379/515421/533378/617017	11
bta00330	Arginine and proline metabolism	6/260	49/9010	0.00269121	0.0222541	0.0174656	414732/281206/281293/338445/505323/516210	6
bta00360	Phenylalanine metabolism	4/260	21/9010	0.00275227	0.0222541	0.0174656	280762/281206/281293/338445	4
bta05230	Central carbon metabolism in cancer	7/260	68/9010	0.00332051	0.0261029	0.0204862	281275/613610/510085/100298939/281235/515067/512571	7
bta04211	Longevity regulating pathway	8/260	90/9010	0.00434287	0.0332171	0.0260696	538598/338446/282323/511961/531682/100298939/282865/407234	8
bta04723	Retrograde endocannabinoid signaling	11/260	152/9010	0.00447119	0.0332195	0.0260715	281790/327673/338084/338065/287327/338079/287027/287014/282323/505283/282023	11
bta04920	Adipocytokine signaling pathway	7/260	72/9010	0.00457795	0.0332195	0.0260715	538598/282855/338446/511961/282865/407234/509459	7
bta05412	Arrhythmogenic right ventricular cardiomyopathy	7/260	76/9010	0.00616534	0.0423235	0.0332165	515011/281875/280979/539375/282608/281062/518117	7
bta04020	Calcium signaling pathway	15/260	252/9010	0.00627269	0.0423235	0.0332165	505824/281970/525931/511783/281986/282323/286799/338037/526379/530719/528555/533378/100336808/518117/521257	15
bta01212	Fatty acid metabolism	6/260	58/9010	0.00628123	0.0423235	0.0332165	532422/513530/281421/613886/509459/508130	6
bta04919	Thyroid hormone signaling pathway	9/260	121/9010	0.00820584	0.0540059	0.0423851	281875/100296004/281986/282323/280979/100298939/789600/525636/518117	9
bta04213	Longevity regulating pathway - multiple species	6/260	62/9010	0.00867291	0.0557826	0.0437795	538598/282323/511961/531682/100298939/281719	6
bta05418	Fluid shear stress and atherosclerosis	10/260	145/9010	0.00914878	0.0575357	0.0451554	280795/281251/515011/281875/493719/507346/280979/281043/338068/539175	10
bta04933	AGE-RAGE signaling pathway in diabetic complications	8/260	103/9010	0.00968209	0.0595659	0.0467488	282191/407125/281251/281986/281375/286799/281043/100298939	8
bta04015	Rap1 signaling pathway	13/260	217/9010	0.0100859	0.0606557	0.0476041	281094/281790/515011/540803/281963/525931/286799/280979/100298939/281885/518180/539034/281530	13
bta00630	Glyoxylate and dicarboxylate metabolism	4/260	30/9010	0.0102879	0.0606557	0.0476041	538173/282873/531682/506459	4
bta03320	PPAR signaling pathway	7/260	84/9010	0.0105248	0.0607859	0.0477063	281759/282855/520598/282865/509459/281758/531199	7
bta04261	Adrenergic signaling in cardiomyocytes	10/260	150/9010	0.0114606	0.0648667	0.050909	281790/100296004/282323/533219/282608/530719/505519/767949/281544/518117	10
bta00061	Fatty acid biosynthesis	3/260	18/9010	0.0140614	0.0772332	0.0606145	532422/513530/508130	3
bta04512	ECM-receptor interaction	7/260	89/9010	0.0141913	0.0772332	0.0606145	282191/515011/281875/513362/107131184/281530/541281	7
bta05205	Proteoglycans in cancer	12/260	204/9010	0.0150523	0.0803735	0.0630791	281875/540803/533729/107131237/282323/280979/281983/100298939/789600/530719/522921/281530	12
bta05020	Prion disease	15/260	282/9010	0.0165212	0.0865835	0.0679529	444878/407125/281251/327673/338084/338065/287327/338079/287027/287014/282323/282393/286885/338086/281941	15
bta05132	Salmonella infection	14/260	261/9010	0.0189261	0.0973832	0.0764287	282689/280795/281181/281251/533729/280979/338039/613753/100298939/531505/505519/514106/539034/101906089	14
bta04010	MAPK signaling pathway	15/260	292/9010	0.0218983	0.110665	0.0868524	281094/515310/280795/281251/540803/505824/533729/525931/282323/286799/100298939/281885/282608/518180/539175	15
bta04726	Serotonergic synapse	8/260	121/9010	0.0236217	0.11728	0.092044	280762/281790/281293/338445/282323/100298939/539175/282023	8
bta00350	Tyrosine metabolism	4/260	39/9010	0.0252544	0.123224	0.0967091	280762/281206/281293/338445	4
bta04916	Melanogenesis	7/260	102/9010	0.0278358	0.133517	0.104788	523325/281790/282323/100298939/281885/789600/530719	7
bta05144	Malaria	5/260	61/9010	0.0308555	0.145535	0.11422	281251/533894/281043/281530/541281	5
bta00920	Sulfur metabolism	2/260	10/9010	0.0320379	0.148635	0.116652	280946/536409	2
bta00982	Drug metabolism - cytochrome P450	5/260	62/9010	0.0328014	0.149602	0.117411	281293/338445/493719/507346/788719	5
bta04530	Tight junction	10/260	178/9010	0.0333035	0.149602	0.117411	524770/541209/317655/282323/511961/280979/281341/531505/505519/515421	10
bta00230	Purine metabolism	8/260	131/9010	0.0356402	0.155172	0.121783	281970/524624/534402/519803/107131388/616992/524973/536409	8
bta04068	FoxO signaling pathway	8/260	131/9010	0.0356402	0.155172	0.121783	512960/538598/282855/511961/531682/112446032/615414/100298939	8
bta04066	HIF-1 signaling pathway	7/260	110/9010	0.039626	0.16428	0.128931	281181/281275/613610/281375/509566/530719/540303	7
bta04931	Insulin resistance	7/260	110/9010	0.039626	0.16428	0.128931	538598/282855/338446/539466/511961/509459/784877	7
bta04728	Dopaminergic synapse	8/260	134/9010	0.0399293	0.16428	0.128931	280762/280795/281790/281293/338445/282323/282459/530719	8
bta00260	Glycine, serine and threonine metabolism	4/260	45/9010	0.0400541	0.16428	0.128931	414732/281293/338445/515067	4
bta05022	Pathways of neurodegeneration - multiple diseases	21/260	490/9010	0.0446778	0.180626	0.14176	444878/281094/523325/281251/327673/338084/338065/287327/338079/287027/287014/534150/282393/286885/531682/100298939/789600/530719/338086/518117/282023	21
bta05165	Human papillomavirus infection	16/260	352/9010	0.0482866	0.192449	0.151039	282191/523325/347700/515011/281875/505267/282323/615414/100298939/789600/282657/539547/512571/281530/541281/282023	16
bta00380	Tryptophan metabolism	4/260	48/9010	0.0489624	0.192449	0.151039	280762/281293/338445/531682	4
bta05014	Amyotrophic lateral sclerosis	17/260	384/9010	0.0522728	0.202647	0.159042	615846/444878/327673/338084/338065/287327/338079/287027/287014/540004/534150/282393/286885/280979/531682/338086/539034	17
bta04657	IL-17 signaling pathway	6/260	95/9010	0.0563851	0.215635	0.169235	280795/540819/281251/281043/508105/282023	6
bta04710	Circadian rhythm	3/260	31/9010	0.0589783	0.220606	0.173137	509058/511961/527470	3
bta04137	Mitophagy - animal	5/260	73/9010	0.0592441	0.220606	0.173137	534615/521378/540803/534150/100298939	5
bta04141	Protein processing in endoplasmic reticulum	9/260	172/9010	0.0610567	0.221526	0.173859	407129/513253/347700/281803/529312/520650/281719/360006/535287	9
bta04145	Phagosome	9/260	172/9010	0.0610567	0.221526	0.173859	407129/281875/787578/280979/281311/282657/317777/281530/541281	9
bta04668	TNF signaling pathway	7/260	124/9010	0.067248	0.240901	0.189065	281094/280795/281251/286799/281043/508105/282023	7
bta04625	C-type lectin receptor signaling pathway	6/260	105/9010	0.0828043	0.289304	0.227053	282226/281251/540803/533729/100298939/282023	6
bta04928	Parathyroid hormone synthesis, secretion and action	6/260	105/9010	0.0828043	0.289304	0.227053	407125/280795/281790/524624/282323/522921	6
bta04012	ErbB signaling pathway	5/260	84/9010	0.0949911	0.326665	0.256375	533729/100298939/530719/518180/522921	5
bta00250	Alanine, aspartate and glutamate metabolism	3/260	38/9010	0.0958063	0.326665	0.256375	280969/281206/539188	3
bta00220	Arginine biosynthesis	2/260	20/9010	0.112208	0.378036	0.296691	281206/539188	2
bta04670	Leukocyte transendothelial migration	6/260	115/9010	0.115024	0.382964	0.300559	524770/281790/280979/531505/505519/514106	6
bta05204	Chemical carcinogenesis - DNA adducts	4/260	65/9010	0.117665	0.387199	0.303883	535293/493719/507346/282023	4
bta04022	cGMP-PKG signaling pathway	8/260	171/9010	0.121494	0.389239	0.305485	281790/538598/100296004/338037/407176/526379/533378/518117	8
bta04935	Growth hormone synthesis, secretion and action	6/260	118/9010	0.125769	0.389239	0.305485	280795/281790/538598/282323/100298939/518180	6
bta05032	Morphine addiction	5/260	92/9010	0.126526	0.389239	0.305485	281790/281970/524624/282323/107131388	5
bta05219	Bladder cancer	3/260	43/9010	0.126555	0.389239	0.305485	100298939/522921/281530	3
bta00561	Glycerolipid metabolism	4/260	67/9010	0.1276	0.389239	0.305485	512112/404129/497202/508493	4
bta00980	Metabolism of xenobiotics by cytochrome P450	4/260	67/9010	0.1276	0.389239	0.305485	617564/535293/493719/507346	4
bta04912	GnRH signaling pathway	5/260	93/9010	0.130771	0.389239	0.305485	407125/282323/100298939/530719/522921	5
bta00340	Histidine metabolism	2/260	22/9010	0.131492	0.389239	0.305485	281293/338445	2
bta04964	Proximal tubule bicarbonate reclamation	2/260	22/9010	0.131492	0.389239	0.305485	282855/282360	2
bta05016	Huntington disease	13/260	319/9010	0.132523	0.389239	0.305485	444878/327673/338084/338065/287327/338079/287027/287014/338446/282393/286885/338086/614472	13
bta04151	PI3K-Akt signaling pathway	15/260	379/9010	0.133414	0.389239	0.305485	282191/281094/538598/515011/281875/505824/282855/525931/286799/514720/615414/100298939/281885/281530/541281	15
bta05222	Small cell lung cancer	5/260	94/9010	0.13508	0.390079	0.306143	282191/515011/281875/512915/282023	5
bta04720	Long-term potentiation	4/260	69/9010	0.137874	0.392315	0.307899	282323/100298939/530719/767949	4
bta04722	Neurotrophin signaling pathway	6/260	122/9010	0.140825	0.392315	0.307899	538598/505824/510342/100298939/530719/518180	6
bta00511	Other glycan degradation	2/260	23/9010	0.1414	0.392315	0.307899	515729/100139170	2
bta00515	Mannose type O-glycan biosynthesis	2/260	23/9010	0.1414	0.392315	0.307899	506551/537054	2
bta04360	Axon guidance	8/260	179/9010	0.146112	0.39861	0.312839	281790/533729/531141/100298939/789600/530719/531505/508869	8
bta04930	Type II diabetes mellitus	3/260	46/9010	0.146486	0.39861	0.312839	538598/282865/512571	3
bta04936	Alcoholic liver disease	7/260	154/9010	0.157222	0.42375	0.332569	281251/338446/511961/613753/282865/407234/509459	7
bta04390	Hippo signaling pathway	7/260	156/9010	0.164604	0.436228	0.342362	523325/505025/281375/280979/789390/615414/789600	7
bta04024	cAMP signaling pathway	10/260	243/9010	0.164934	0.436228	0.342362	280795/281790/286879/533729/524624/282323/282459/530719/616139/518117	10
bta04950	Maturity onset diabetes of the young	2/260	26/9010	0.171974	0.440923	0.346047	539542/539547	2
bta04934	Cushing syndrome	7/260	158/9010	0.172139	0.440923	0.346047	523325/281790/534212/282323/789600/530719/107131388	7
bta05207	Chemical carcinogenesis - receptor activation	9/260	216/9010	0.172407	0.440923	0.346047	535293/280795/281790/493719/507346/282323/511716/100298939/504769	9
bta05034	Alcoholism	10/260	246/9010	0.173927	0.440923	0.346047	280762/540819/281790/281293/338445/505824/282323/282459/100298939/531564	10
bta00270	Cysteine and methionine metabolism	3/260	50/9010	0.174499	0.440923	0.346047	281206/281275/280946	3
bta04926	Relaxin signaling pathway	6/260	131/9010	0.177532	0.444615	0.348945	282191/280795/281790/282323/286799/100298939	6
bta00280	Valine, leucine and isoleucine degradation	3/260	51/9010	0.181726	0.451127	0.354055	280969/280759/535508	3
bta05133	Pertussis	4/260	78/9010	0.187821	0.462204	0.362749	280795/281790/281251/613753	4
bta05323	Rheumatoid arthritis	5/260	106/9010	0.191333	0.466787	0.366346	281094/280795/281251/281043/282657	5
bta04115	p53 signaling pathway	4/260	80/9010	0.199634	0.482876	0.378973	512960/281375/615414/281530	4
bta00062	Fatty acid elongation	2/260	29/9010	0.203493	0.488038	0.383024	281421/613886	2
bta04640	Hematopoietic cell lineage	5/260	110/9010	0.211707	0.503472	0.395137	281094/281251/515011/505574/281885	5
bta04310	Wnt signaling pathway	7/260	169/9010	0.21609	0.509612	0.399956	523325/282323/789390/615414/789600/530719/282069	7
bta04340	Hedgehog signaling pathway	3/260	56/9010	0.218949	0.512087	0.401899	536011/282323/615414	3
bta04146	Peroxisome	4/260	84/9010	0.223895	0.519362	0.407608	511716/531682/281235/535508	4
bta04725	Cholinergic synapse	5/260	114/9010	0.232742	0.534635	0.419595	280795/281790/282323/100298939/530719	5
bta04330	Notch signaling pathway	3/260	58/9010	0.234257	0.534635	0.419595	523325/505267/539547	3
bta04550	Signaling pathways regulating pluripotency of stem cells	6/260	144/9010	0.236416	0.535245	0.420073	523325/505025/100298939/789600/338068/281335	6
bta04140	Autophagy - animal	6/260	145/9010	0.241181	0.541701	0.42514	538598/540803/282323/508631/507309/100298939	6
bta04122	Sulfur relay system	1/260	10/9010	0.25395	0.565018	0.44344	280946	1
bta00410	beta-Alanine metabolism	2/260	34/9010	0.257137	0.565018	0.44344	280969/614548	2
bta04730	Long-term depression	3/260	61/9010	0.257553	0.565018	0.44344	281790/100298939/112442078	3
bta00480	Glutathione metabolism	3/260	62/9010	0.265389	0.577732	0.453418	493719/507346/281235	3
bta04014	Ras signaling pathway	9/260	243/9010	0.268736	0.580551	0.455631	281094/540803/505824/533729/525931/282323/286799/100298939/281885	9
bta04540	Gap junction	4/260	92/9010	0.274412	0.588159	0.461602	281790/525931/282323/100298939	4
bta05142	Chagas disease	5/260	122/9010	0.276414	0.588159	0.461602	280795/281790/281251/281375/281043	5
bta04072	Phospholipase D signaling pathway	6/260	153/9010	0.280259	0.588782	0.462091	512112/282226/540803/525931/100298939/281885	6
bta04350	TGF-beta signaling pathway	4/260	93/9010	0.280868	0.588782	0.462091	281154/505025/338068/281530	4
bta01522	Endocrine resistance	4/260	94/9010	0.287347	0.597936	0.469275	280795/282323/100298939/522921	4
bta05163	Human cytomegalovirus infection	9/260	251/9010	0.300065	0.615973	0.48343	281790/281251/281875/281803/282323/281043/100298939/518180/282023	9
bta04666	Fc gamma R-mediated phagocytosis	4/260	96/9010	0.300368	0.615973	0.48343	613548/533729/614576/518180	4
bta04927	Cortisol synthesis and secretion	3/260	67/9010	0.304921	0.62081	0.487227	534212/282323/107131388	3
bta01250	Biosynthesis of nucleotide sugars	2/260	39/9010	0.310995	0.62253	0.488576	513586/534402	2
bta05221	Acute myeloid leukemia	3/260	68/9010	0.31287	0.62253	0.488576	515310/534401/100298939	3
bta04062	Chemokine signaling pathway	7/260	191/9010	0.313758	0.62253	0.488576	281790/533729/282323/281043/100298939/518180/511771	7
bta00430	Taurine and hypotaurine metabolism	1/260	13/9010	0.316764	0.62253	0.488576	614548	1
bta03450	Non-homologous end-joining	1/260	13/9010	0.316764	0.62253	0.488576	613590	1
bta05231	Choline metabolism in cancer	4/260	99/9010	0.320022	0.623365	0.489232	514865/280795/525931/100298939	4
bta04974	Protein digestion and absorption	5/260	130/9010	0.321595	0.623365	0.489232	359712/282191/538590/507881/536818	5
bta04713	Circadian entrainment	4/260	101/9010	0.333182	0.639352	0.501779	280795/281790/282323/530719	4
bta05211	Renal cell carcinoma	3/260	71/9010	0.336735	0.639352	0.501779	533729/100298939/518180	3
bta05321	Inflammatory bowel disease	3/260	71/9010	0.336735	0.639352	0.501779	281251/527470/782481	3
bta05206	MicroRNAs in cancer	10/260	293/9010	0.338879	0.639352	0.501779	538598/613548/539873/517232/615414/100298939/518180/281530/281544/282023	10
bta04924	Renin secretion	3/260	73/9010	0.352628	0.657166	0.51576	281790/281970/282323	3
bta00564	Glycerophospholipid metabolism	4/260	104/9010	0.352965	0.657166	0.51576	512112/514865/497202/524639	4
bta05202	Transcriptional misregulation in cancer	7/260	201/9010	0.360733	0.667238	0.523665	515310/505025/534401/512915/615414/539542/782481	7
bta04976	Bile secretion	4/260	106/9010	0.366161	0.671081	0.526681	535293/534212/282323/282360	4
bta04915	Estrogen signaling pathway	5/260	138/9010	0.367553	0.671081	0.526681	280795/281790/282323/100298939/522921	5
bta04142	Lysosome	5/260	139/9010	0.373318	0.674961	0.529726	515729/281421/530164/281433/282657	5
bta00514	Other types of O-glycan biosynthesis	2/260	45/9010	0.374448	0.674961	0.529726	505267/537054	2
bta05225	Hepatocellular carcinoma	6/260	174/9010	0.387763	0.694537	0.54509	523325/493719/507346/280979/100298939/789600	6
bta05140	Leishmaniasis	3/260	78/9010	0.392113	0.697912	0.547738	280795/281251/282023	3
bta04064	NF-kappa B signaling pathway	4/260	112/9010	0.405618	0.71617	0.562067	281251/508105/613753/282023	4
bta00450	Selenocompound metabolism	1/260	18/9010	0.409963	0.71617	0.562067	536409	1
bta00730	Thiamine metabolism	1/260	18/9010	0.409963	0.71617	0.562067	282090	1
bta04979	Cholesterol metabolism	2/260	50/9010	0.42547	0.734272	0.576274	533894/534212	2
bta04742	Taste transduction	3/260	83/9010	0.430971	0.734272	0.576274	281963/281970/282323	3
bta05224	Breast cancer	5/260	150/9010	0.436482	0.734272	0.576274	523325/280795/100298939/789600/539547	5
bta05146	Amoebiasis	4/260	117/9010	0.43815	0.734272	0.576274	524770/282191/281251/282323	4
bta04917	Prolactin signaling pathway	3/260	84/9010	0.438641	0.734272	0.576274	280795/615414/100298939	3
bta00100	Steroid biosynthesis	1/260	20/9010	0.443593	0.734272	0.576274	533726	1
bta00520	Amino sugar and nucleotide sugar metabolism	2/260	52/9010	0.445274	0.734272	0.576274	513586/534402	2
bta00600	Sphingolipid metabolism	2/260	52/9010	0.445274	0.734272	0.576274	100139170/281433	2
bta04975	Fat digestion and absorption	2/260	52/9010	0.445274	0.734272	0.576274	512112/404129	2
bta04911	Insulin secretion	3/260	85/9010	0.446271	0.734272	0.576274	282323/407176/530719	3
bta05164	Influenza A	6/260	188/9010	0.459998	0.750449	0.58897	347700/281251/507054/540004/280979/281043	6
bta00590	Arachidonic acid metabolism	3/260	87/9010	0.461407	0.750449	0.58897	511716/504769/282023	3
bta05135	Yersinia infection	5/260	156/9010	0.470398	0.760701	0.597017	280795/281251/280979/281043/518180	5
bta00770	Pantothenate and CoA biosynthesis	1/260	22/9010	0.475313	0.761051	0.597291	614548	1
bta04150	mTOR signaling pathway	5/260	157/9010	0.475993	0.761051	0.597291	523325/538598/100298939/789600/282657	5
bta04914	Progesterone-mediated oocyte maturation	3/260	90/9010	0.483769	0.769138	0.603638	281790/282323/538794	3
bta04727	GABAergic synapse	3/260	91/9010	0.491125	0.770328	0.604572	280969/281790/282323	3
bta05162	Measles	5/260	160/9010	0.492658	0.770328	0.604572	347700/280795/281251/508105/615414	5
bta04060	Cytokine-cytokine receptor interaction	10/260	333/9010	0.494927	0.770328	0.604572	281094/407110/281251/507054/281043/514720/338068/511771/540517/281254	10
bta04621	NOD-like receptor signaling pathway	6/260	195/9010	0.495405	0.770328	0.604572	281251/781355/528169/281043/508105/338039	6
bta04370	VEGF signaling pathway	2/260	58/9010	0.502302	0.776784	0.609639	100298939/282023	2
bta04610	Complement and coagulation cascades	3/260	93/9010	0.505682	0.777761	0.610406	281375/505574/281983	3
bta05134	Legionellosis	2/260	59/9010	0.511436	0.782359	0.614015	281251/326581	2
bta04218	Cellular senescence	5/260	165/9010	0.519991	0.786986	0.617645	540803/281375/615414/100298939/518502	5
bta04061	Viral protein interaction with cytokine and cytokine receptor	3/260	95/9010	0.520022	0.786986	0.617645	281094/281043/511771	3
bta04925	Aldosterone synthesis and secretion	3/260	96/9010	0.527108	0.793466	0.622731	286879/282323/530719	3
bta05152	Tuberculosis	6/260	205/9010	0.544552	0.806184	0.632713	282226/281251/787578/282657/530719/317777	6
bta04913	Ovarian steroidogenesis	2/260	63/9010	0.546857	0.806184	0.632713	282323/282023	2
bta05217	Basal cell carcinoma	2/260	63/9010	0.546857	0.806184	0.632713	523325/789600	2
bta00563	Glycosylphosphatidylinositol (GPI)-anchor biosynthesis	1/260	27/9010	0.546952	0.806184	0.632713	515306	1
bta05170	Human immunodeficiency virus 1 infection	7/260	242/9010	0.551932	0.80931	0.635166	280795/281790/533729/281803/515595/100298939/518180	7
bta00053	Ascorbate and aldarate metabolism	1/260	28/9010	0.560065	0.817002	0.641203	280910	1
bta04380	Osteoclast differentiation	4/260	138/9010	0.567344	0.823377	0.646206	281094/280795/540819/281251	4
bta04392	Hippo signaling pathway - multiple species	1/260	29/9010	0.572799	0.827052	0.649091	533729	1
bta01040	Biosynthesis of unsaturated fatty acids	1/260	30/9010	0.585167	0.83796	0.657652	613886	1
bta00052	Galactose metabolism	1/260	31/9010	0.597178	0.83796	0.657652	534402	1
bta04520	Adherens junction	2/260	70/9010	0.604427	0.83796	0.657652	524770/280979	2
bta04664	Fc epsilon RI signaling pathway	2/260	70/9010	0.604427	0.83796	0.657652	282226/100298939	2
bta00040	Pentose and glucuronate interconversions	1/260	32/9010	0.608842	0.83796	0.657652	617564	1
bta00500	Starch and sucrose metabolism	1/260	32/9010	0.608842	0.83796	0.657652	534402	1
bta04660	T cell receptor signaling pathway	3/260	109/9010	0.613625	0.83796	0.657652	280795/533729/100298939	3
bta04750	Inflammatory mediator regulation of TRP channels	3/260	110/9010	0.619824	0.83796	0.657652	281251/282323/530719	3
bta00562	Inositol phosphate metabolism	2/260	72/9010	0.619829	0.83796	0.657652	281986/281543	2
bta00830	Retinol metabolism	2/260	72/9010	0.619829	0.83796	0.657652	281615/504769	2
bta03020	RNA polymerase	1/260	33/9010	0.62017	0.83796	0.657652	614472	1
bta04130	SNARE interactions in vesicular transport	1/260	33/9010	0.62017	0.83796	0.657652	507309	1
bta04217	Necroptosis	5/260	185/9010	0.622203	0.83796	0.657652	347700/281251/507054/508105/530719	5
bta04623	Cytosolic DNA-sensing pathway	2/260	73/9010	0.627356	0.83796	0.657652	281251/507054	2
bta05218	Melanoma	2/260	73/9010	0.627356	0.83796	0.657652	525931/100298939	2
bta04120	Ubiquitin mediated proteolysis	4/260	150/9010	0.633395	0.83796	0.657652	538814/515595/513789/535287	4
bta00140	Steroid hormone biosynthesis	2/260	76/9010	0.649243	0.83796	0.657652	532422/504769	2
bta00983	Drug metabolism - other enzymes	2/260	76/9010	0.649243	0.83796	0.657652	493719/507346	2
bta04918	Thyroid hormone synthesis	2/260	76/9010	0.649243	0.83796	0.657652	407129/282323	2
bta05100	Bacterial invasion of epithelial cells	2/260	76/9010	0.649243	0.83796	0.657652	280979/518180	2
bta00760	Nicotinate and nicotinamide metabolism	1/260	36/9010	0.65223	0.83796	0.657652	616992	1
bta04620	Toll-like receptor signaling pathway	3/260	116/9010	0.655596	0.83796	0.657652	280795/281251/613753	3
bta04659	Th17 cell differentiation	3/260	116/9010	0.655596	0.83796	0.657652	280795/281251/527470	3
bta05214	Glioma	2/260	77/9010	0.656309	0.83796	0.657652	100298939/530719	2
bta05220	Chronic myeloid leukemia	2/260	77/9010	0.656309	0.83796	0.657652	100298939/518180	2
bta04960	Aldosterone-regulated sodium reabsorption	1/260	37/9010	0.662305	0.83796	0.657652	538598	1
bta01524	Platinum drug resistance	2/260	78/9010	0.663262	0.83796	0.657652	493719/507346	2
bta05416	Viral myocarditis	2/260	78/9010	0.663262	0.83796	0.657652	100296004/280979	2
bta01521	EGFR tyrosine kinase inhibitor resistance	2/260	80/9010	0.676828	0.844699	0.66294	525931/100298939	2
bta04071	Sphingolipid signaling pathway	3/260	120/9010	0.678072	0.844699	0.66294	282226/281790/100298939	3
bta00790	Folate biosynthesis	1/260	39/9010	0.681593	0.844699	0.66294	530736	1
bta05310	Asthma	1/260	39/9010	0.681593	0.844699	0.66294	282226	1
bta04114	Oocyte meiosis	3/260	121/9010	0.68352	0.844699	0.66294	282323/538794/530719	3
bta05166	Human T-cell leukemia virus 1 infection	6/260	238/9010	0.689036	0.845231	0.663358	407129/407125/280795/282323/615414/100298939	6
bta05216	Thyroid cancer	1/260	40/9010	0.690821	0.845231	0.663358	100298939	1
bta05417	Lipid and atherosclerosis	6/260	239/9010	0.69291	0.845231	0.663358	280795/281251/281043/613753/100298939/530719	6
bta00860	Porphyrin metabolism	1/260	41/9010	0.699783	0.849951	0.667062	514194	1
bta04662	B cell receptor signaling pathway	2/260	85/9010	0.708805	0.85723	0.672775	280795/100298939	2
bta00071	Fatty acid degradation	1/260	44/9010	0.725145	0.86589	0.679572	509459	1
bta04973	Carbohydrate digestion and absorption	1/260	44/9010	0.725145	0.86589	0.679572	506423	1
bta05143	African trypanosomiasis	1/260	44/9010	0.725145	0.86589	0.679572	281251	1
bta05203	Viral carcinogenesis	6/260	249/9010	0.729893	0.867298	0.680676	524770/347700/282323/615414/100298939/512571	6
bta05210	Colorectal cancer	2/260	89/9010	0.732453	0.867298	0.680676	280795/100298939	2
bta04612	Antigen processing and presentation	2/260	91/9010	0.743655	0.876893	0.688207	407129/281803	2
bta04216	Ferroptosis	1/260	47/9010	0.748372	0.878793	0.689698	514194	1
bta05235	PD-L1 expression and PD-1 checkpoint pathway in cancer	2/260	94/9010	0.759706	0.888316	0.697172	280795/100298939	2
bta04962	Vasopressin-regulated water reabsorption	1/260	49/9010	0.762759	0.888316	0.697172	282323	1
bta01523	Antifolate resistance	1/260	50/9010	0.769643	0.892659	0.700581	281251	1
bta04961	Endocrine and other factor-regulated calcium reabsorption	1/260	51/9010	0.776327	0.893821	0.701493	282323	1
bta05215	Prostate cancer	2/260	98/9010	0.779753	0.893821	0.701493	525931/100298939	2
bta03460	Fanconi anemia pathway	1/260	52/9010	0.782818	0.893821	0.701493	539547	1
bta04658	Th1 and Th2 cell differentiation	2/260	99/9010	0.784531	0.893821	0.701493	280795/782481	2
bta04210	Apoptosis	3/260	143/9010	0.786436	0.893821	0.701493	280795/280979/100298939	3
bta00565	Ether lipid metabolism	1/260	54/9010	0.795243	0.900103	0.706423	282311	1
bta04972	Pancreatic secretion	2/260	102/9010	0.798325	0.900103	0.706423	282360/518117	2
bta00240	Pyrimidine metabolism	1/260	57/9010	0.812565	0.908701	0.71317	616992	1
bta05169	Epstein-Barr virus infection	5/260	235/9010	0.813811	0.908701	0.71317	347700/281803/508105/615414/539547	5
bta01240	Biosynthesis of cofactors	3/260	152/9010	0.819784	0.908701	0.71317	513586/513530/280910	3
bta05226	Gastric cancer	3/260	153/9010	0.823202	0.908701	0.71317	523325/100298939/789600	3
bta05213	Endometrial cancer	1/260	59/9010	0.823294	0.908701	0.71317	100298939	1
bta05171	Coronavirus disease - COVID-19	6/260	281/9010	0.826797	0.908701	0.71317	347700/280795/281251/768327/281043/522921	6
bta04940	Type I diabetes mellitus	1/260	60/9010	0.828427	0.908701	0.71317	281251	1
bta04650	Natural killer cell mediated cytotoxicity	3/260	157/9010	0.83633	0.913369	0.716834	282226/533729/100298939	3
bta04724	Glutamatergic synapse	2/260	113/9010	0.842441	0.913369	0.716834	281790/282323	2
bta05145	Toxoplasmosis	2/260	114/9010	0.845985	0.913369	0.716834	281790/613753	2
bta03013	Nucleocytoplasmic transport	2/260	115/9010	0.849458	0.913369	0.716834	540004/506392	2
bta04929	GnRH secretion	1/260	65/9010	0.851947	0.913369	0.716834	100298939	1
bta04514	Cell adhesion molecules	3/260	163/9010	0.854449	0.913369	0.716834	281875/281062/281941	3
bta05332	Graft-versus-host disease	1/260	66/9010	0.85625	0.913369	0.716834	281251	1
bta04630	JAK-STAT signaling pathway	4/260	209/9010	0.858502	0.913369	0.716834	407110/514720/615414/100298939	4
bta04110	Cell cycle	2/260	125/9010	0.880461	0.929955	0.729851	512915/615414	2
bta05223	Non-small cell lung cancer	1/260	73/9010	0.883079	0.929955	0.729851	100298939	1
bta05167	Kaposi sarcoma-associated herpesvirus infection	4/260	220/9010	0.88395	0.929955	0.729851	347700/280795/100298939/282023	4
bta03018	RNA degradation	1/260	79/9010	0.902065	0.942009	0.739311	540303	1
bta04721	Synaptic vesicle cycle	1/260	79/9010	0.902065	0.942009	0.739311	282657	1
bta04144	Endocytosis	4/260	250/9010	0.93419	0.97197	0.762825	616979/513789/100298939/614576	4
bta04070	Phosphatidylinositol signaling system	1/260	97/9010	0.942488	0.977011	0.766782	281986	1
bta03015	mRNA surveillance pathway	1/260	102/9010	0.950403	0.97954	0.768767	525143	1
bta04970	Salivary secretion	1/260	103/9010	0.95185	0.97954	0.768767	282323	1
bta03010	Ribosome	2/260	168/9010	0.957558	0.981844	0.770575	534352/768327	2
bta05160	Hepatitis C	2/260	172/9010	0.96157	0.982399	0.77101	347700/100298939	2
bta05161	Hepatitis B	2/260	177/9010	0.966077	0.983453	0.771838	280795/100298939	2
bta04613	Neutrophil extracellular trap formation	3/260	253/9010	0.979051	0.993088	0.779399	515011/280979/338039	3
bta05017	Spinocerebellar ataxia	1/260	146/9010	0.986571	0.994034	0.780142	518117	1
bta04080	Neuroactive ligand-receptor interaction	5/260	380/9010	0.987009	0.994034	0.780142	281963/518336/338070/281688/521257	5
bta05168	Herpes simplex virus 1 infection	5/260	416/9010	0.993917	0.997441	0.782816	347700/281251/281803/540342/281043	5
bta05322	Systemic lupus erythematosus	1/260	203/9010	0.997553	0.997553	0.782904	524770	1
